# Supplementary material for: Association of Platelet Thromboxane Inhibition by Low‐Dose Aspirin With Platelet Count and Cytoreductive Therapy in Essential Thrombocythemia
Source: PubMed Central journal article supplement — Clin Pharmacol Ther. 2021 Nov 20;111(4):939–49. doi: 10.1002/cpt.2485 (PMC9299058; doi:10.1002/cpt.2485), 2021-11-20
Supplement: CPT-111-939-s001.pdf [file CPT-111-939-s001.pdf]

**Table S1 – Univariate analysis of the association of the sTXB<sub>2</sub> levels with the clinical and hematologic features at Visit 2**

| <i>Variable</i>                | <i>Standardized B</i> | <i>Univariate p</i> |
|--------------------------------|-----------------------|---------------------|
| <i>Platelet Count</i>          | 0.35                  | <0.0001             |
| <i>Leukocyte Count</i>         | 0.13                  | 0.046               |
| <i>Age at enrollment</i>       | -0.20                 | 0.002               |
| <i>Female Sex</i>              | -0.21                 | 0.198               |
| <i>JAK2 mutation</i>           | 0.42                  | 0.09                |
| <i>Body mass index</i>         | -0.01                 | 0.55                |
| <i>Cytoreductive treatment</i> | -0.73                 | <0.0001             |

**Table S2. Characteristics of ET patients overall and according to the absence (no) or presence (yes) of cytoreductive drugs at randomization.**

|                                  | [ALL]<br><i>n</i> =243 | No<br><i>n</i> =98 | Yes<br><i>n</i> =145 | P overall |
|----------------------------------|------------------------|--------------------|----------------------|-----------|
| Sex:                             |                        |                    |                      | 0.044     |
| Male                             | 112 (46.1%)            | 37 (37.8%)         | 75 (51.7%)           |           |
| Female                           | 131 (53.9%)            | 61 (62.2%)         | 70 (48.3%)           |           |
| Age at enrollment<br>(years)     | 60.0 [51.0;67.0]       | 53.0 [45.0;59.0]   | 66.0 [57.0;69.0]     | <0.001    |
| Diagnosis (Years)                | 5.00 [2.00;10.0]       | 4.00 [2.00;9.00]   | 5.00 [3.00;10.0]     | 0.034     |
| BMI (kg/m <sup>2</sup> )         | 25.0 [22.9;27.3]       | 24.6 [21.9;26.6]   | 25.2 [23.0;28.1]     | 0.030     |
| Leukocytes (x10 <sup>9</sup> /L) | 7.00 [5.66;8.50]       | 7.77 [6.73;9.17]   | 6.41 [5.15;7.69]     | <0.001    |
| Hematocrit (%)                   | 41.7 [39.2;44.3]       | 43.4 [40.5;45.1]   | 40.7 [38.4;43.6]     | <0.001    |
| Platelets (x10 <sup>9</sup> /L)  | 521 [422;641]          | 631 [524;776]      | 455 [391;536]        | <0.001    |
| TXB <sub>2</sub> (ng/ml)         | 19.0 [9.20;42.6]       | 37.1 [16.0;64.0]   | 14.0 [8.00;29.0]     | <0.001    |
| TXM<br>(pg/mg<br>creatinine)     | 428 [318;618]          | 407 [303;611]      | 438 [326;629]        | 0.294     |
| <i>JAK2-V617F</i> ,n (%)†        |                        |                    |                      | 0.140     |
| Wild Type                        | 99 (40.7%)             | 34 (34.7%)         | 65 (44.8%)           |           |
| Mutated                          | 143 (58.8%)            | 64 (65.3%)         | 79 (54.5%)           |           |
| 'Missing'                        | 1 (0.41%)              | 0 (0.00%)          | 1 (0.69%)            |           |
| <i>CALR</i> , n (%):             |                        |                    |                      | 0.258     |
| Type 1                           | 19 (7.82%)             | 6 (6.12%)          | 13 (8.97%)           |           |
| Type 2                           | 16 (6.58%)             | 4 (4.08%)          | 12 (8.28%)           |           |
| Other                            | 93 (38.3%)             | 35 (35.7%)         | 58 (40.0%)           |           |

|                        | [ALL]<br><i>n=243</i> | No<br><i>n=98</i> | Yes<br><i>n=145</i> | P overall |
|------------------------|-----------------------|-------------------|---------------------|-----------|
| 'Missing'              | 115 (47.3%)           | 53 (54.1%)        | 62 (42.8%)          |           |
| <i>MPL, n (%)</i> :    |                       |                   |                     | 0.061     |
| Wild Type              | 111 (45.7%)           | 36 (36.7%)        | 75 (51.7%)          |           |
| Mutated                | 6 (2.47%)             | 3 (3.06%)         | 3 (2.07%)           |           |
| Not determined         | 125 (51.4%)           | 59 (60.2%)        | 66 (45.5%)          |           |
| 'Missing'              | 1 (0.41%)             | 0 (0.00%)         | 1 (0.69%)           |           |
| Microvascular symptoms |                       |                   |                     | 0.266     |
| No                     | 218 (89.7%)           | 91 (92.9%)        | 127 (87.6%)         |           |
| Yes                    | 25 (10.3%)            | 7 (7.14%)         | 18 (12.4%)          |           |
| Previous thrombosis**: |                       |                   |                     | 0.088     |
| No                     | 234 (96.3%)           | 97 (99.0%)        | 137 (94.5%)         |           |
| Yes                    | 9 (3.70%)             | 1 (1.02%)         | 8 (5.52%)           |           |

Quantitative values are reported as median (interquartile range), unless otherwise indicated. Significant differences between the different groups were tested based on the Kruskal-Wallis test or chi-square test for continuous or discrete variables.

Abbreviations: BMI: body mass index; TX: thromboxane.

\*\* Defined as any major thrombosis occurring within 2 years before diagnosis and at any time afterward .

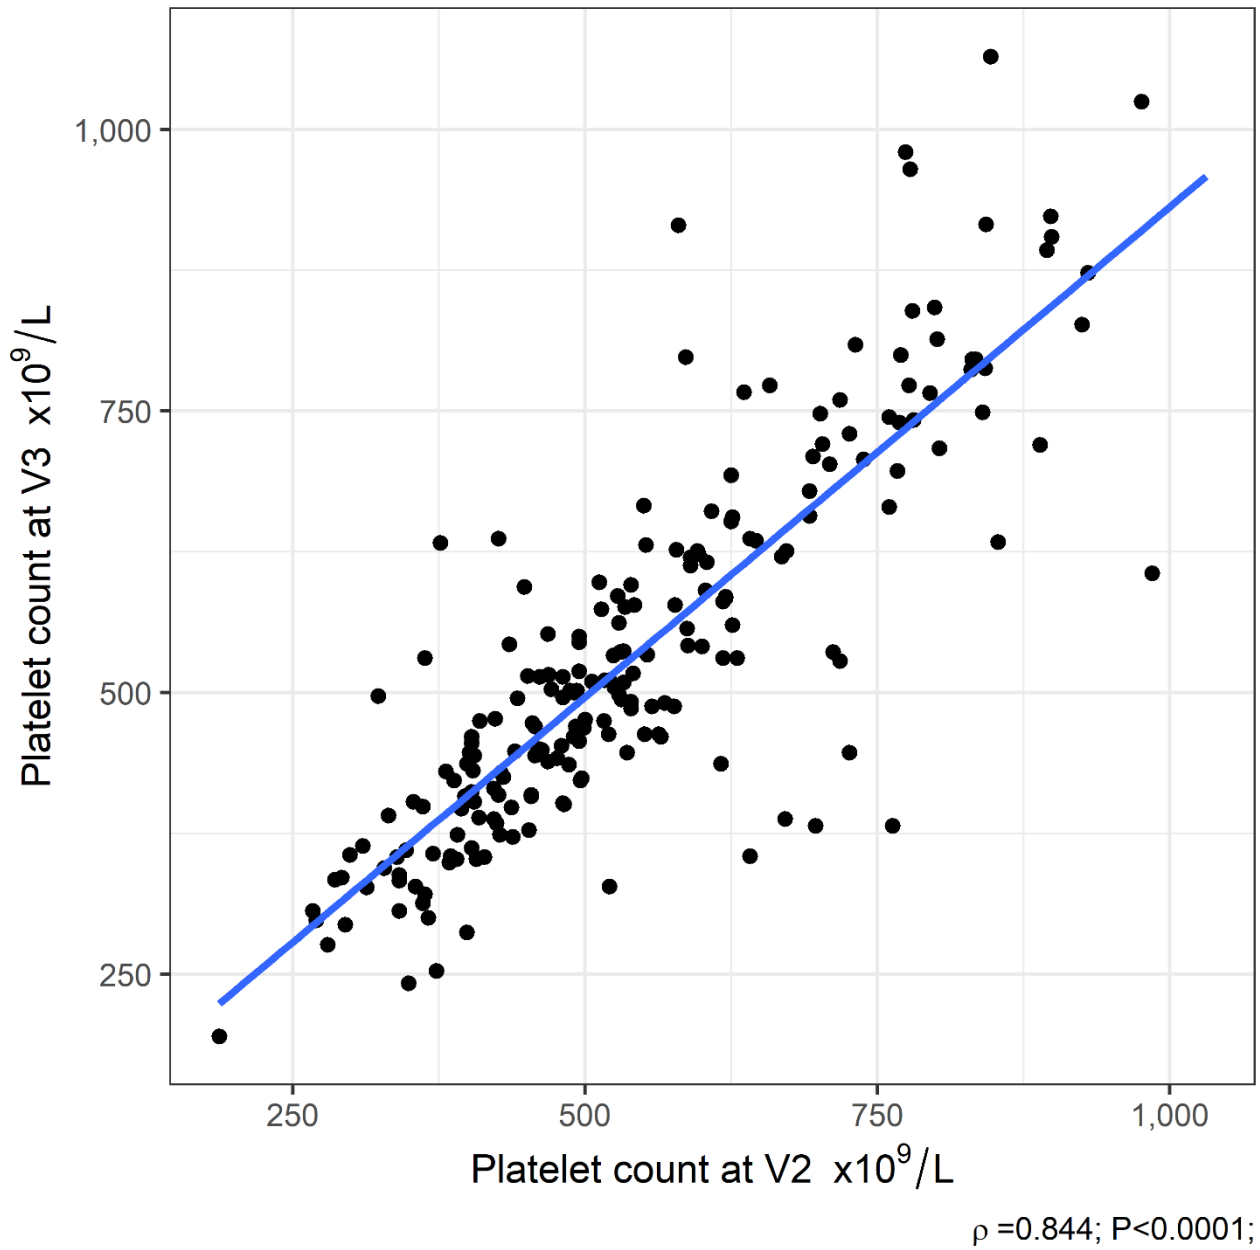

**Figure S1. Correlation between platelet count at visit 2 and visit 3.** The plots depict the correlation of platelet counts ( $\times 10^9/L$ ) at randomization visit 2 (V2) and at the end of the randomized treatment visit 3 (V3).
